# Supplementary material for: Flexible nitrogen-doped graphene/carbon nanotube/Co3O4paper and its oxygen reduction activity
Source: Royal Society of Chemistry journal article supplement (doi:10.1039/c4nr02101k), 2014-01-01
Supplement: c4nr02101k1.pdf [file c4nr02101k1.pdf]

Electronic Supplementary Information for:

## Flexible nitrogen-doped graphene/carbon nanotube/ $\text{Co}_3\text{O}_4$ paper and its oxygen reduction activity

Shan-Shan Li, Huai-Ping Cong, Ping Wang and Shu-Hong Yu

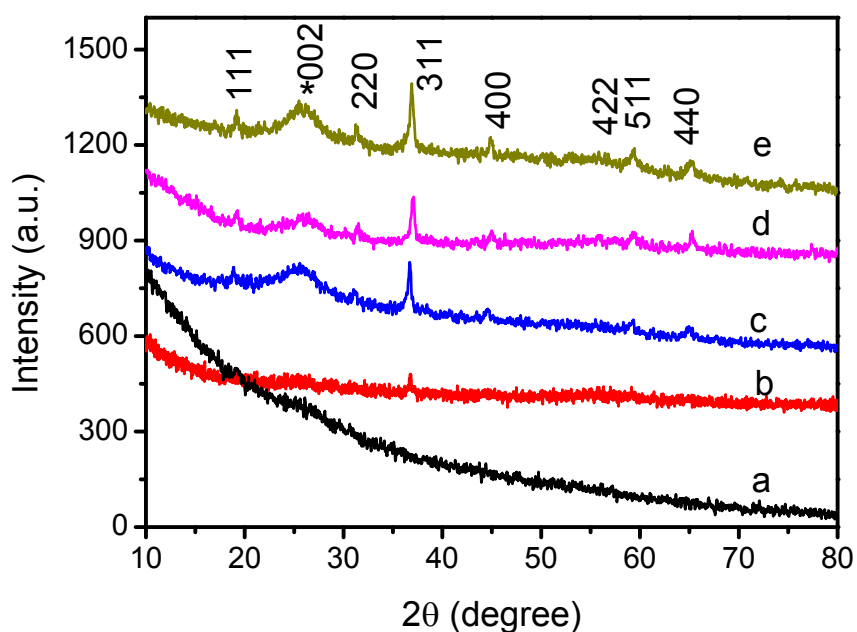

**Fig. S1** Time-dependent XRD patterns of initial  $\text{Co}^{2+}$ -GO/CNT papers with the hydrothermal treatment in ammonia solution at  $180^\circ\text{C}$ : (a) 0; (b) 0.5; (c) 1; (d) 2; (e) 3h.

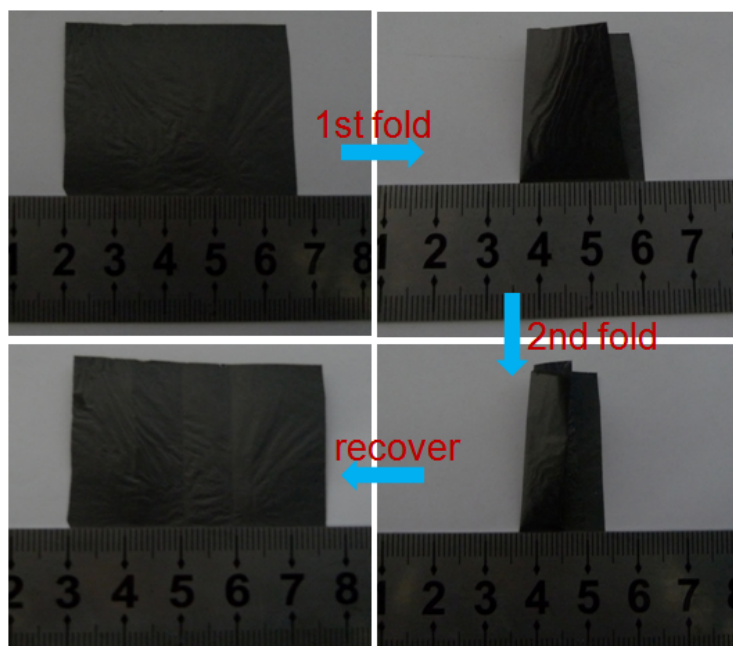

**Fig. S2** Photographs showing the flexibility of the NG/CNT/Co<sub>3</sub>O<sub>4</sub> paper.

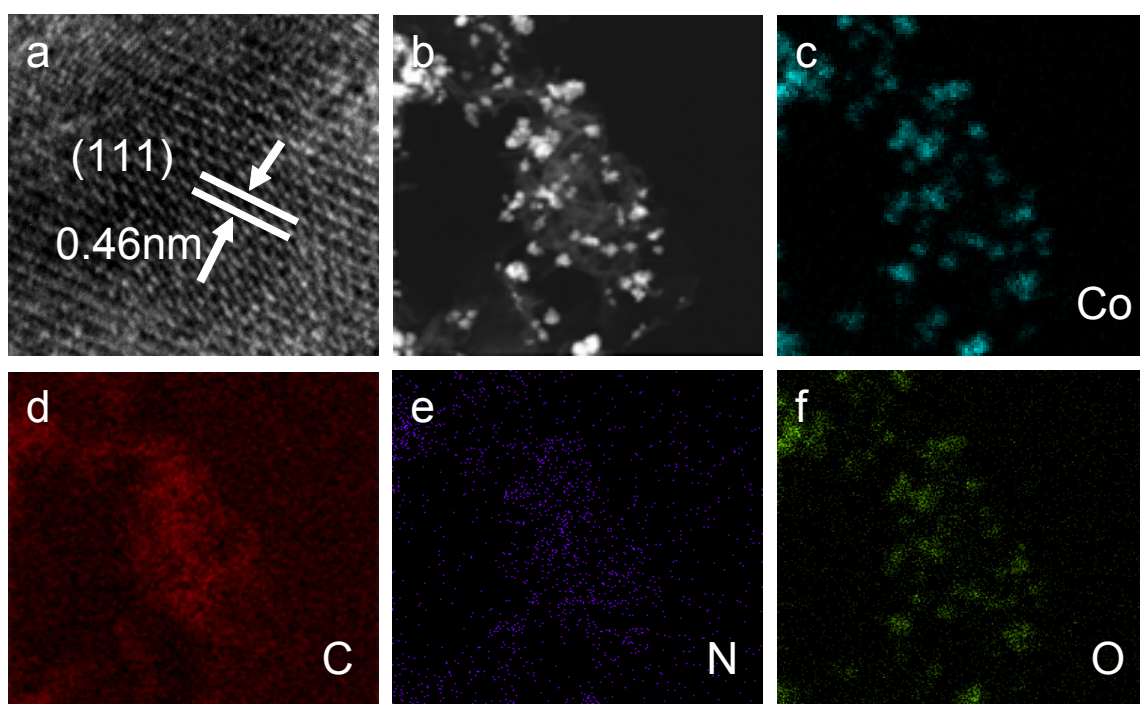

**Fig. S3** (a) HRTEM image; (b) STEM image; (c-f) Corresponding elemental mapping images of (c) Co, (d) C, (e) N and (f) O element of NG/CNT/Co<sub>3</sub>O<sub>4</sub> paper.

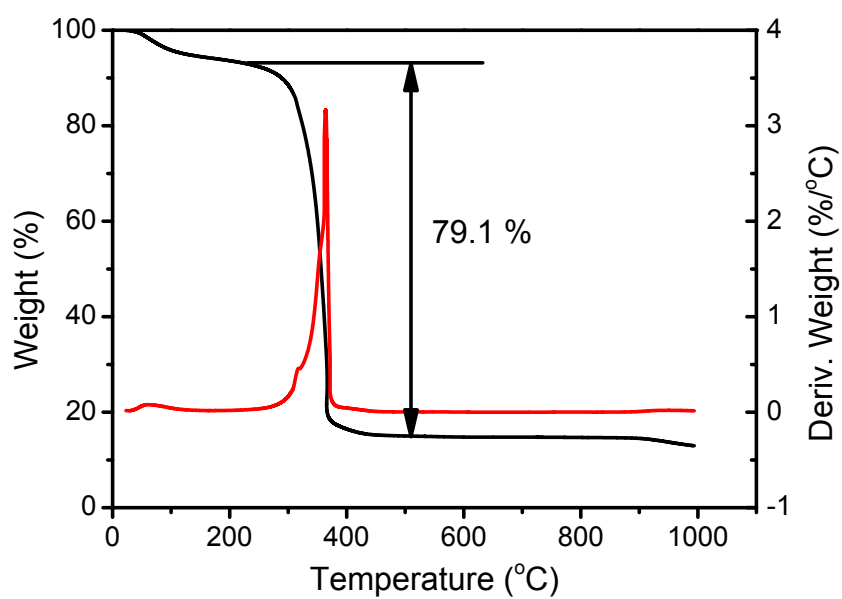

**Fig. S4** DSC-TGA curves of NG/CNT/Co<sub>3</sub>O<sub>4</sub> paper measured in the air with the heat rate of 10 K min<sup>-1</sup>.

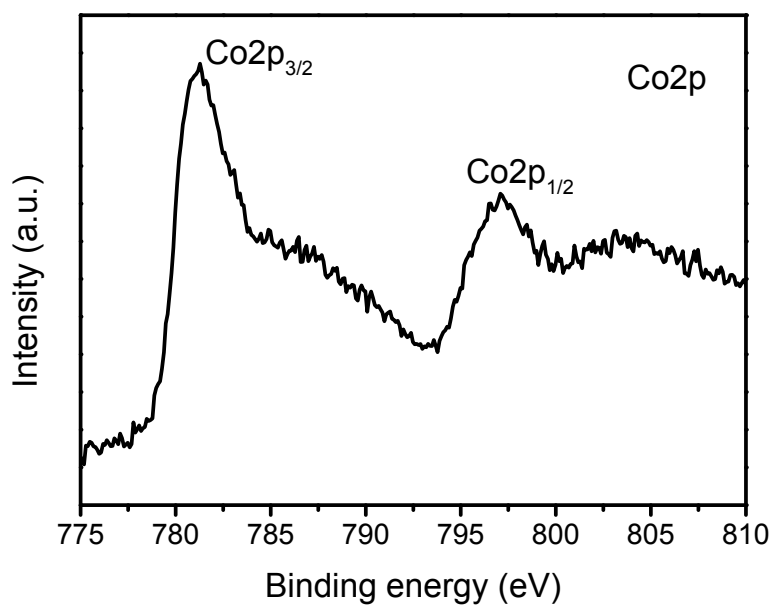

**Fig. S5** Co2p core-level XPS spectrum of NG/CNT/Co<sub>3</sub>O<sub>4</sub> paper.

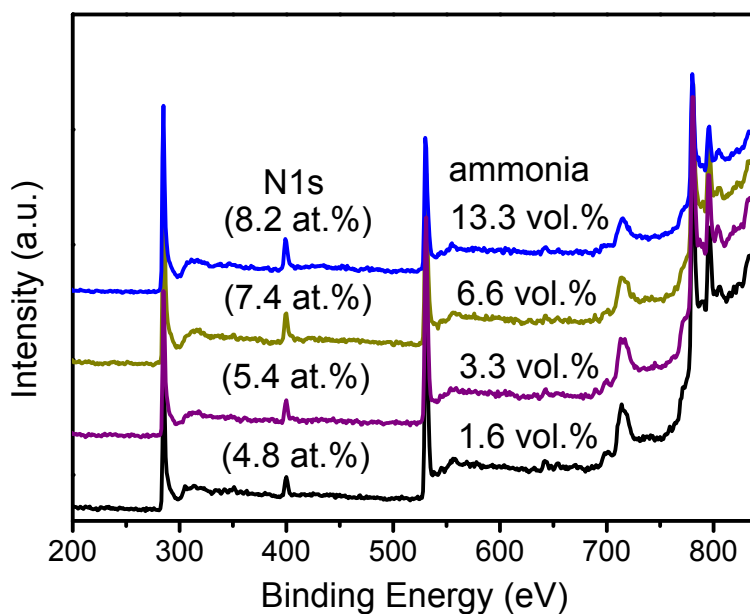

**Fig. S6** XPS spectra of NG/CNT/Co<sub>3</sub>O<sub>4</sub> papers prepared with the hydrothermal treatments in ammonia solutions with different concentrations (from 1.6 vol. % to 13.3 vol. %).

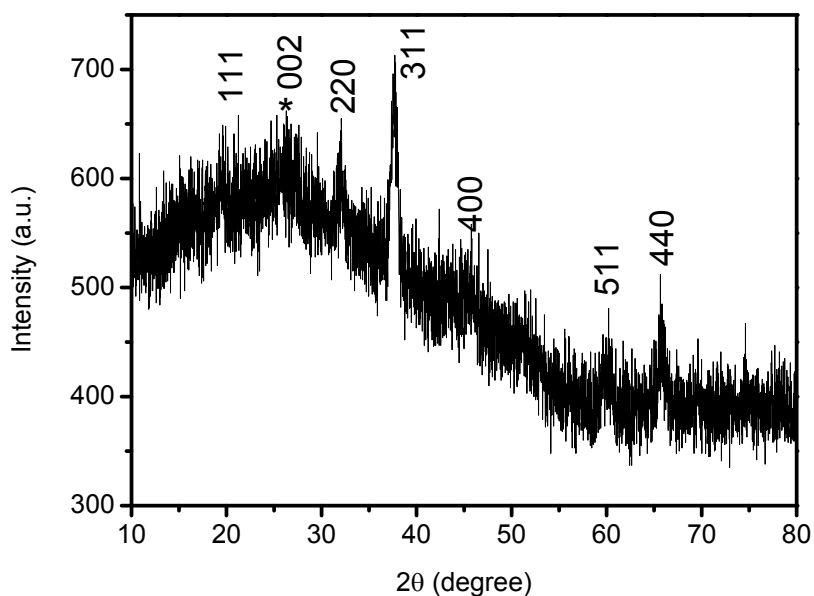

**Fig. S7** XRD pattern of physically mixed NG/CNT/Co<sub>3</sub>O<sub>4</sub> paper.

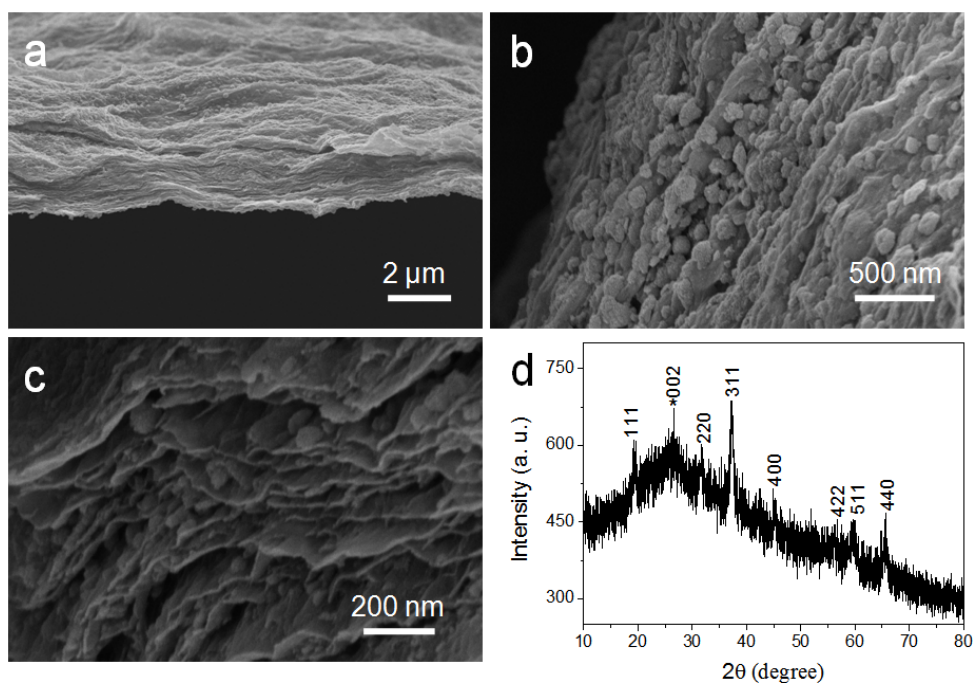

**Fig. S8** (a) SEM image of the cross-section of NG/Co<sub>3</sub>O<sub>4</sub> paper; (b) SEM image of the surface of NG/Co<sub>3</sub>O<sub>4</sub> paper; (c) High-magnified SEM image of the cross-section NG/Co<sub>3</sub>O<sub>4</sub> paper; (d) XRD pattern of NG/Co<sub>3</sub>O<sub>4</sub> paper.

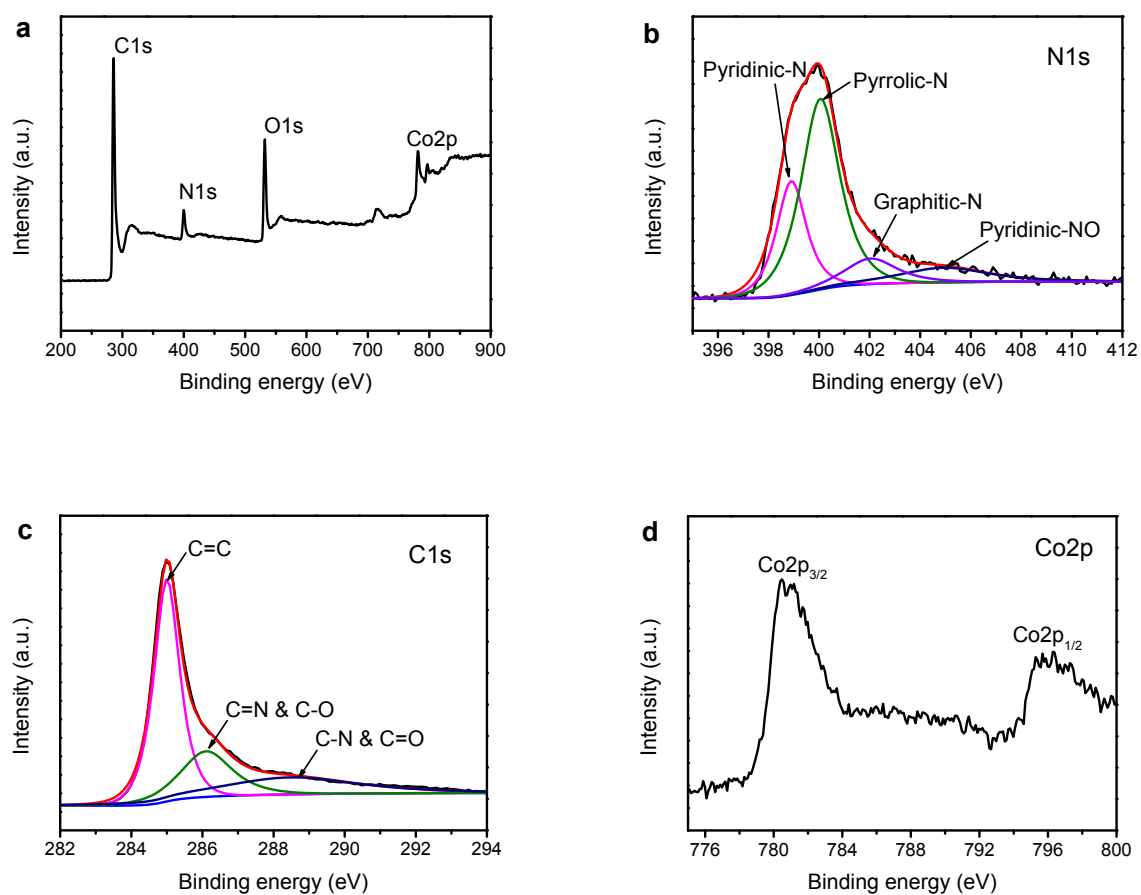

**Fig. S9** XPS spectra of NG/Co<sub>3</sub>O<sub>4</sub> paper. (a) survey XPS spectrum; (b) N1s core-level XPS spectra; (c) C1s core-level XPS spectra; (d) Co2p core-level XPS spectrum.

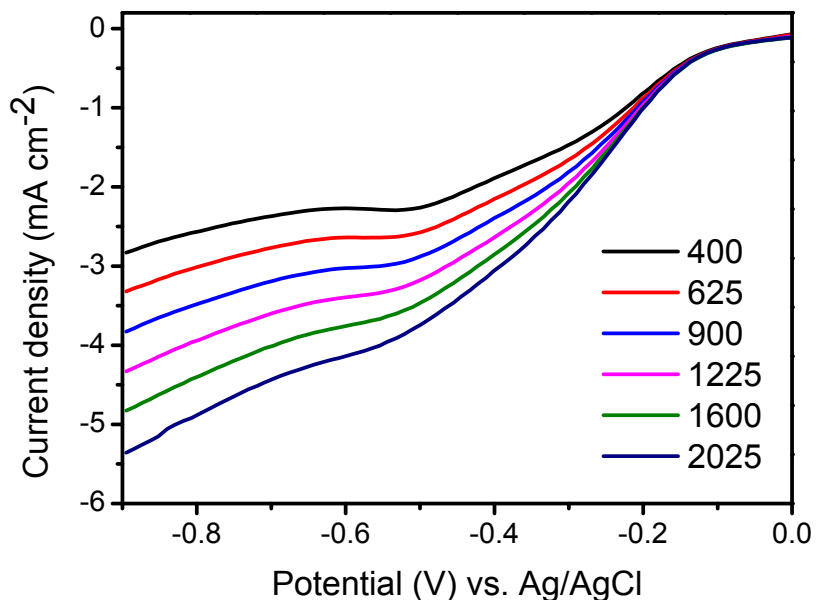

**Fig. S10** RDE voltammograms of NG/CNT/Co<sub>3</sub>O<sub>4</sub> paper in O<sub>2</sub>-saturated 0.1 M KOH at different rotation speeds with sweep rate of 10 mV s<sup>-1</sup>.

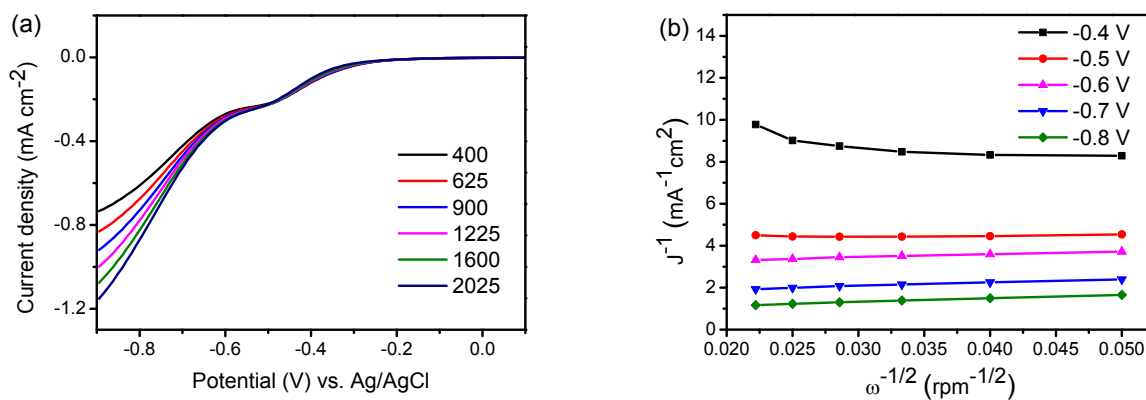

**Fig. S11** (a) RDE voltammograms of initial Co<sup>2+</sup>-GO/CNT paper in O<sub>2</sub>-saturated 0.1 M KOH at different rotation speeds (sweep rate: 10 mV s<sup>-1</sup>); (b) Corresponding K-L plots (J<sup>-1</sup> versus ω<sup>-1/2</sup>) at different potentials.

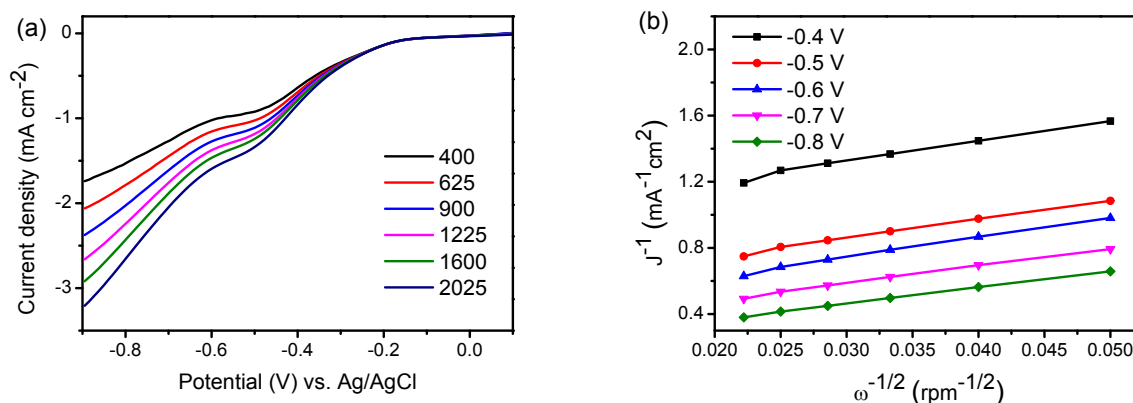

**Fig. S12** (a) RDE voltammograms of NG paper in O<sub>2</sub>-saturated 0.1 M KOH at different rotation speeds (sweep rate: 10 mV s<sup>-1</sup>); (b) Corresponding K-L plots ( $J^{-1}$  versus  $\omega^{-1/2}$ ) at different potentials.

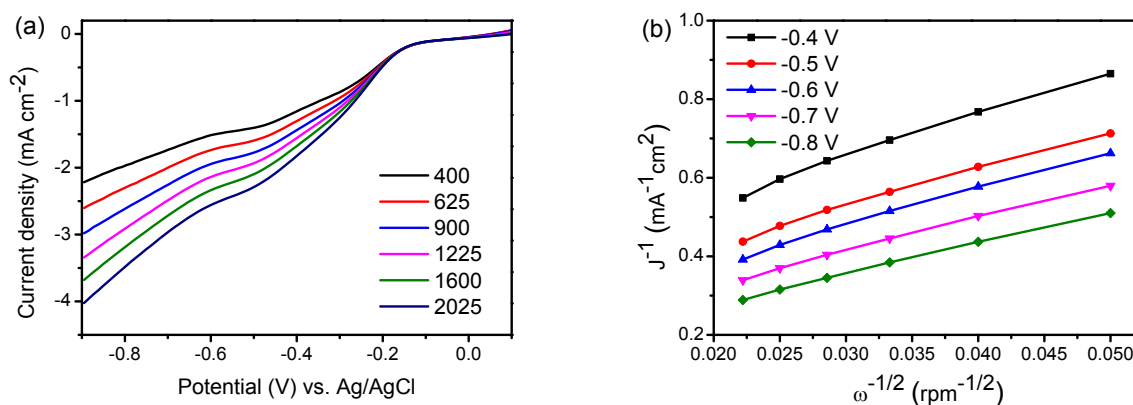

**Fig. S13** (a) RDE voltammograms of NG/CNT paper in O<sub>2</sub>-saturated 0.1 M KOH at different rotation speeds (sweep rate: 10 mV s<sup>-1</sup>); (b) Corresponding K-L plots ( $J^{-1}$  versus  $\omega^{-1/2}$ ) at different potentials.

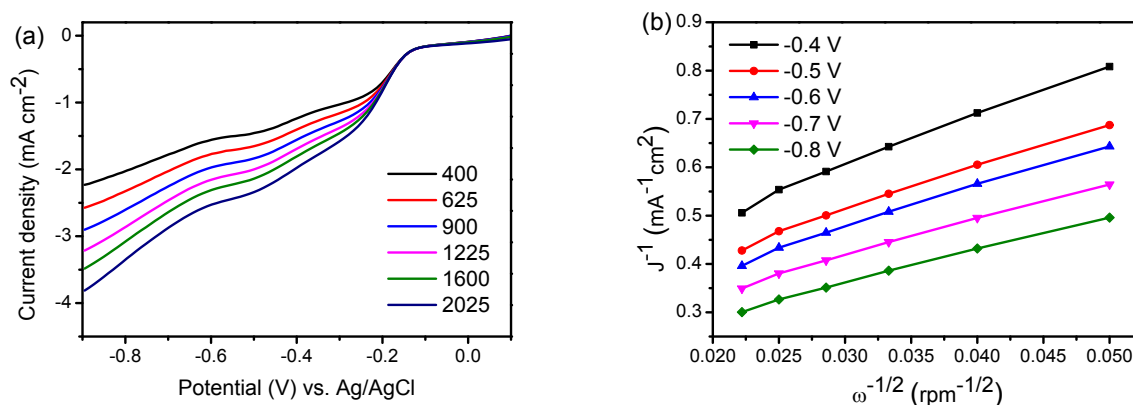

**Fig. S14** (a) RDE voltammograms of NG/Co<sub>3</sub>O<sub>4</sub> paper in O<sub>2</sub>-saturated 0.1 M KOH at different rotation speeds (sweep rate: 10 mV s<sup>-1</sup>); (b) Corresponding K-L plots ( $J^{-1}$  versus  $\omega^{-1/2}$ ) at different potentials.

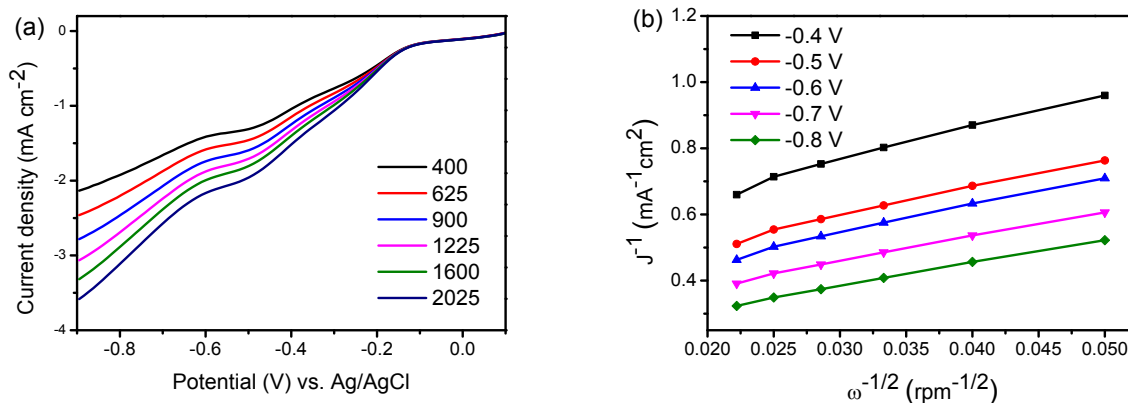

**Fig. S15** (a) RDE voltammograms of physically-mixed NG/CNT/Co<sub>3</sub>O<sub>4</sub> paper in O<sub>2</sub>-saturated 0.1 M KOH at different rotation speeds (sweep rate: 10 mV s<sup>-1</sup>); (b) Corresponding K-L plots ( $J^{-1}$  versus  $\omega^{-1/2}$ ) at different potentials.

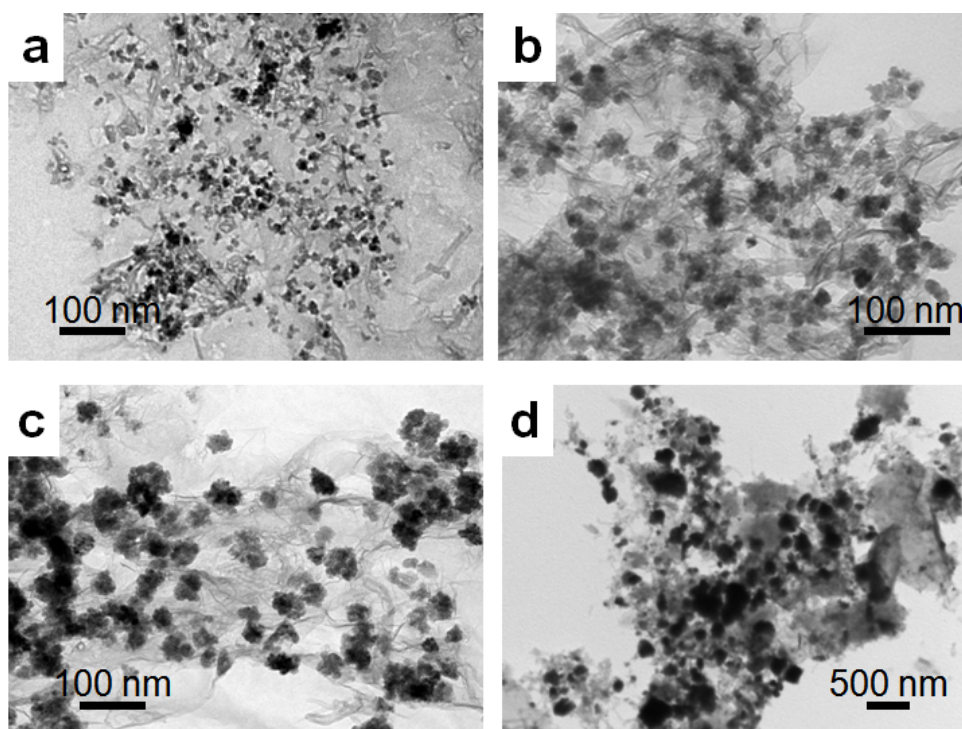

**Fig. S16** SEM images of the NG/CNT/Co<sub>3</sub>O<sub>4</sub> papers synthesized with different contents of Co(NO<sub>3</sub>)<sub>2</sub>. (a) 0.1 mmol; (b) 0.2 mmol; (c) 0.3 mmol and (d) 0.4 mmol.



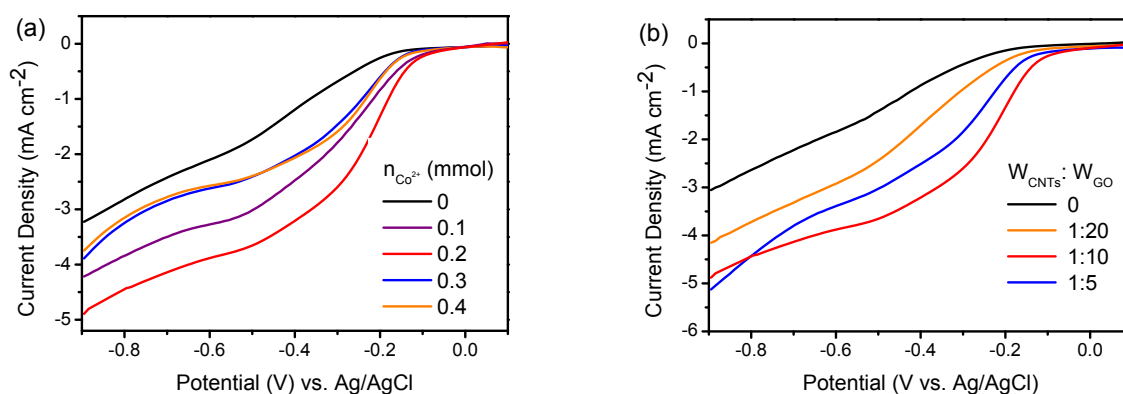

**Fig. S17** RDE voltammograms for the NG/CNT/ $\text{Co}_3\text{O}_4$  papers synthesized with (a) different contents of  $\text{Co}(\text{NO}_3)_2$  with the constant weight ratio of CNT and GO of 1:10 and (b) different weight ratios of CNTs and GO in  $\text{O}_2$ -saturated 0.1 M KOH solution at rotation speed of 1600 rpm and sweep rate of  $10 \text{ mV s}^{-1}$ .

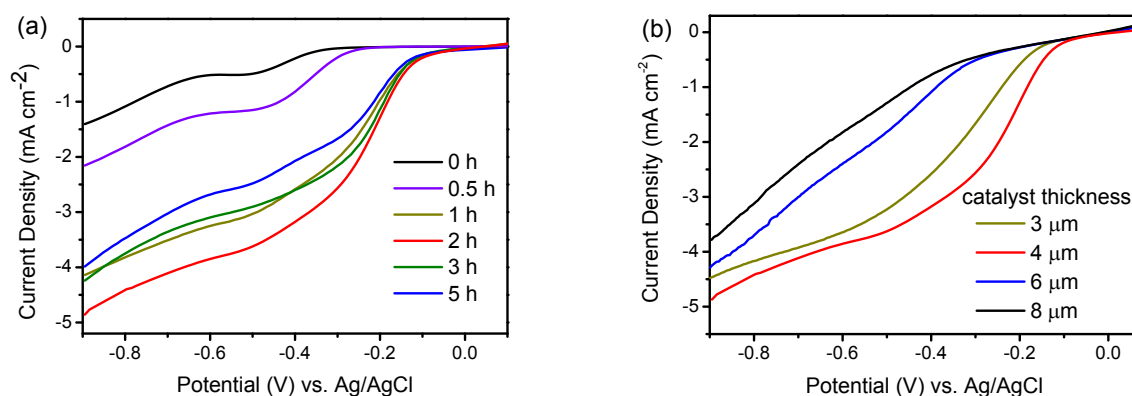

**Fig. S18** RDE voltammograms for the NG/CNT/ $\text{Co}_3\text{O}_4$  papers synthesized with (a) different hydrothermal time and (b) different thicknesses by changing the volumes of the mixtures at the optimized relative contents of CNT, GO and cobalt nitrate.
